# Supplementary material
Source: Springer Nature journal article supplement (https://www.springermedizin.de/resource/supplementary/12970_2012_291_MOESM2_ESM.pdf/9594764)

**A**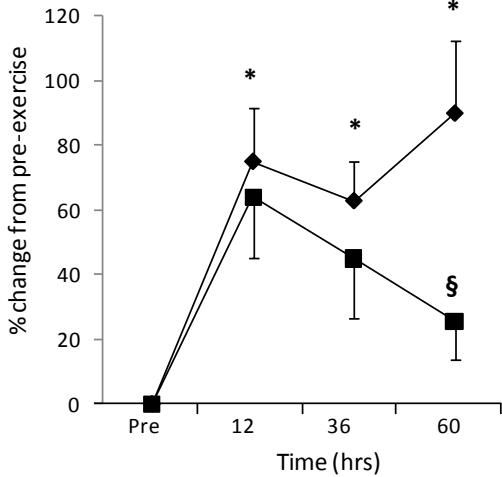**B**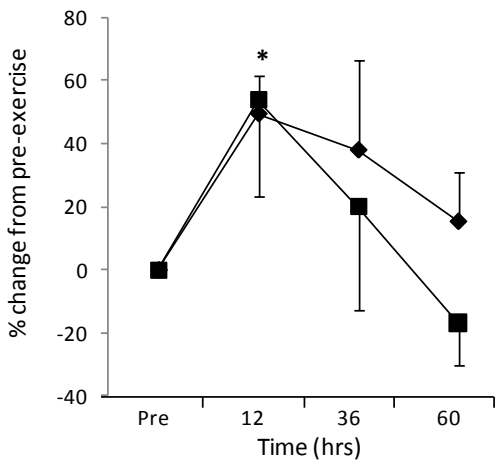**C**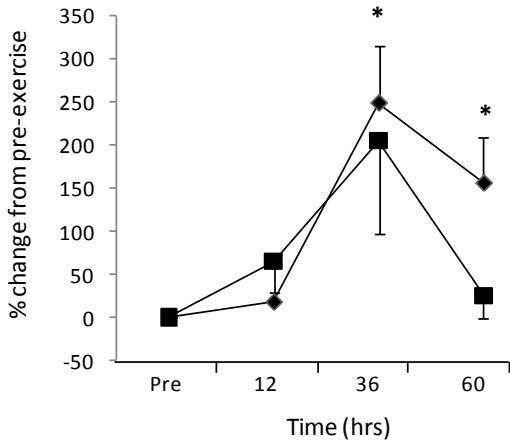**D**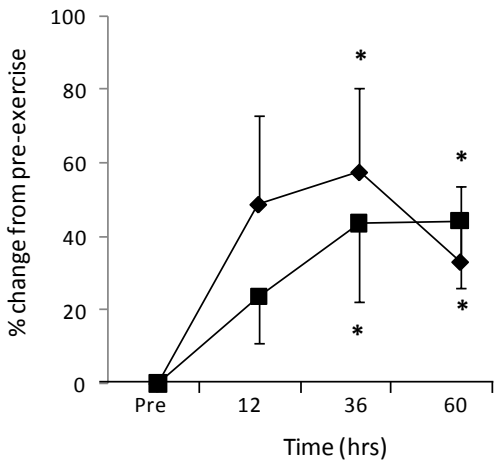

Supplement: MOESM2 [file 9594764]
